# Supplementary figures and images for: Modulation of Intestinal Epithelial Permeability via Protease-Activated Receptor-2-Induced Autophagy
Source: MDPI journal article supplement (doi:10.3390/cells11050878), 2022-03-03

**A**

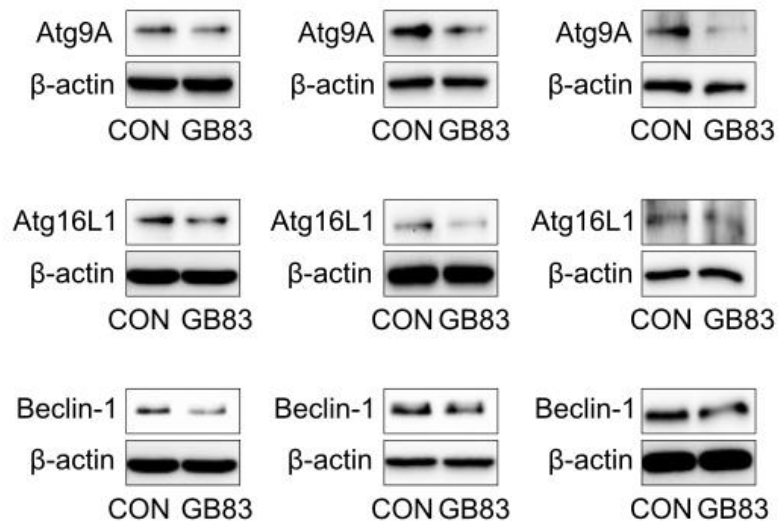

**B**

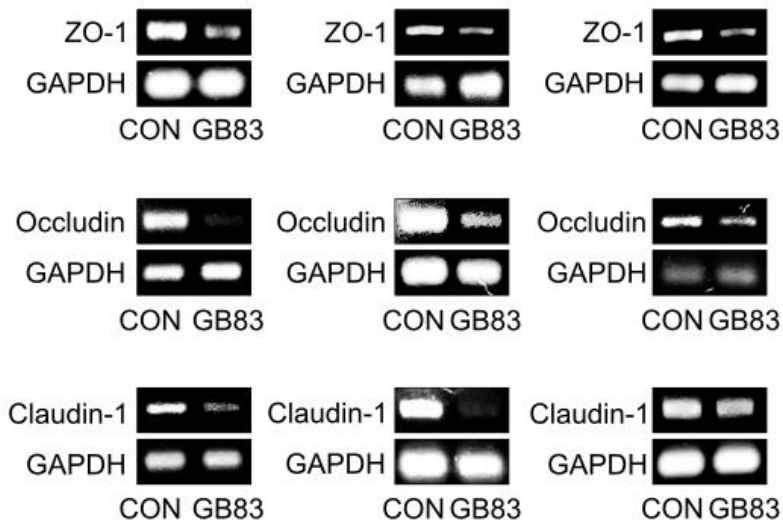

**C**

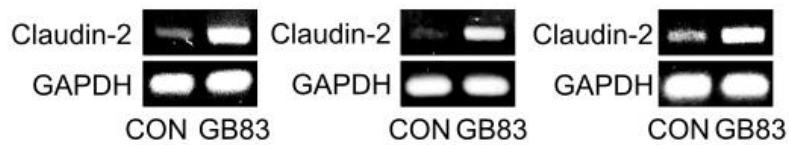

Supplementary Figure S1

**A**

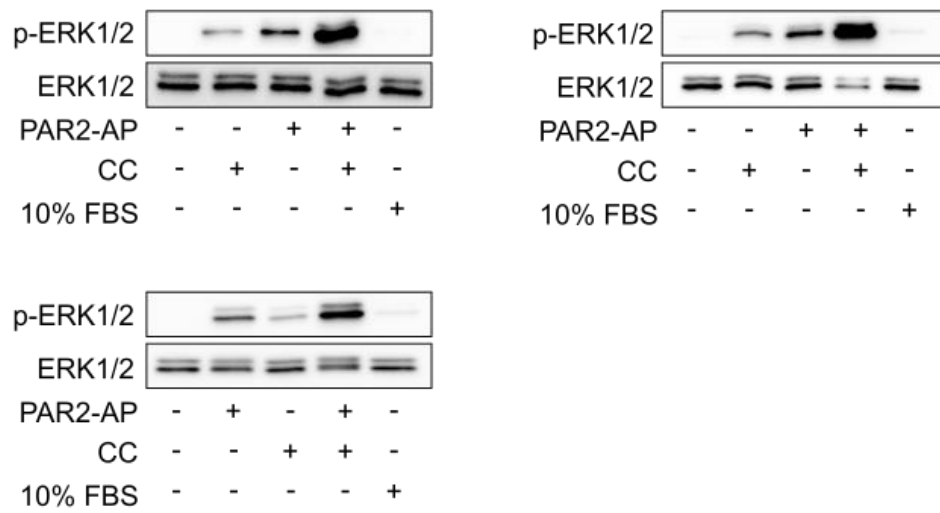

**B**

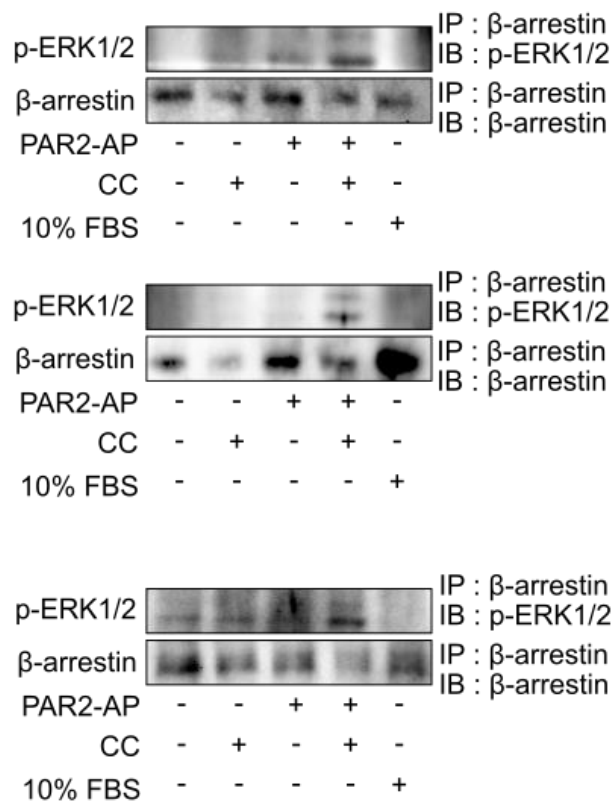

Supplementary Figure S2

A

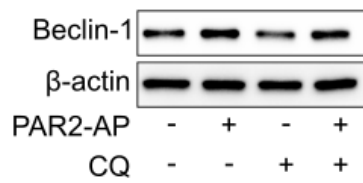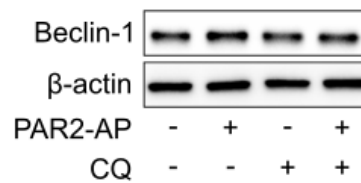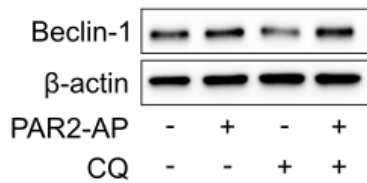

B

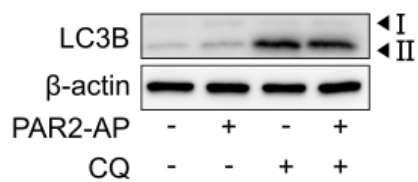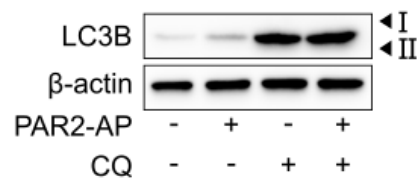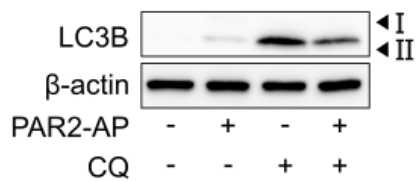

C

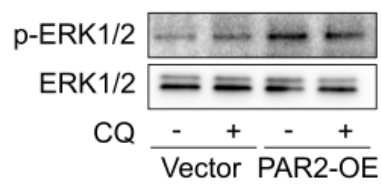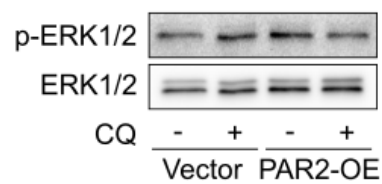

D

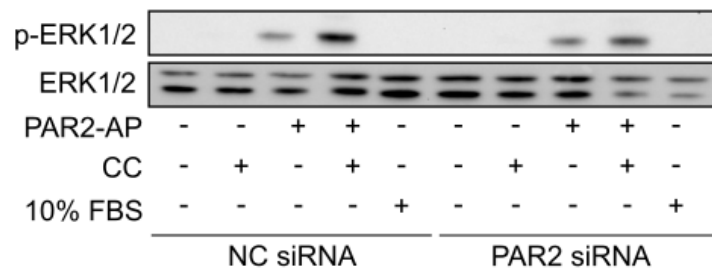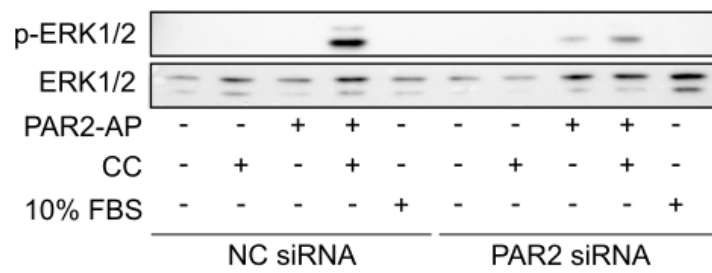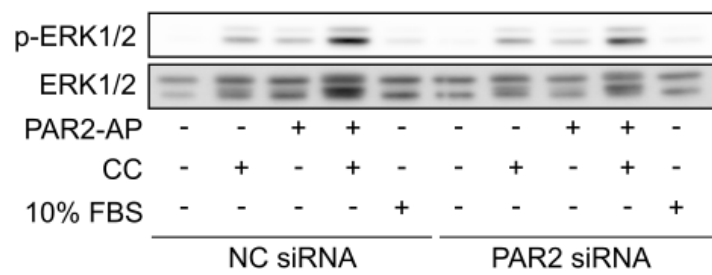

Supplementary Figure S3

Supplement: s1 [file s1]
